# Supplementary material for: 25CN-NBOMe Metabolites in Rat Urine, Human Liver Microsomes and C. elegans—Structure Determination and Synthesis of the Most Abundant Metabolites
Source: Metabolites. 2021 Mar 31;11(4):212. doi: 10.3390/metabo11040212 (PMC8066366; doi:10.3390/metabo11040212)
Supplement: Supplementary file 1 [file metabolites-11-00212-s001.xlsx]

## Sheet: Sheet1
No.	Metabolite	Metabolite structure	Measured m/z	Calculated m/z	Elemental composition	Error [ppm]	Relative abundance
IS	25CN-NBOMe-d3	25CN-NBOCD3	329.976	330.19	expected error:	-646.598	in HR-MSMS
		C7H6-OCD3	124.01	124.084	expected error:	-596.369	in HR-MSMS
M1	25CN-NBOMe		327.165	327.171	C19H23O3N2	-18.6447	0.0277778
			65.0039	65.0391	C5H5	-541.674	0.0388889
			91.0017	91.0548	C7H7	-582.946	0.333333
			93.0165	93.0704	C7H9	-579.454	0.333333
			105.98	106.042	C7H6O	-584.675	0.0555556
			120.993	121.065	C8H9O	-598.85	1
M2	hydroxy-25CN-NBOMe 1		343.16	343.166	C19H23O4N2	-15.7358	0.00571429
			106.987	107.05	C7H7O	-587.578	0.0761905
			136.978	137.06	C8H9O2	-596.818	1
			174.957	175.063	C10H9O2N	-606.638	0.047619
			189.971	190.087	C11H12O2N	-608.669	0.609524
			206.986	207.113	C11H15O2N2	-616.57	0.133333
M3	hydroxy-25CN-NBOMe 2		343.16	343.165	C19H23O4N2	-16.1147	0.03
			106.987	107.05	C7H7O	-582.907	0.0428571
			109.002	109.065	C7H9O	-583.137	1
			136.979	137.06	C8H9O2	-594.629	0.857143
M4	hydroxy-25CN-NBOMe 3		343.161	343.165	C19H23O4N2	-13.2006	0.02
			91.0024	91.0548	C7H7	-575.258	0.1
			120.993	121.065	C8H9O	-595.546	1
M5	dehydro-25CN-NBOMe		325.15	325.155	C19H21O3N2	-15.3773	0.0517241
			120.993	121.065	C8H9O	-594.72	1.03448
			91.0043	91.0548	C7H7	-554.392	0.0862069
M6	dehydro-25CN-NBOMe-N-oxide		341.145	341.15	C19H21O4N2	-15.2426	0.137441
			159.943	160.04	C19H21O3N2	-607.973	0.056872
			174.958	175.063	C10H9O2N	-603.21	0.492891
			189.972	190.087	C11H12O2N	-605.513	1
M7	dehydro-hydroxy-25CN-NBOMe		341.145	341.15	C19H21O4N2	-14.0701	0.0625
			120.993	121.065	C8H9O	-594.72	0.0714286
			134.964	135.045	C8H7O2	-595.359	1
			189.972	190.087	C11H12O2N	-603.409	0.0535714
M8	O-demethyl-hydroxy-25CN-NBOMe		329.144	329.15	C18H21O4N2	-17.0135	0.0136986
			106.987	107.05	C7H7O	-582.907	0.0821918
			136.979	137.06	C8H9O2	-594.629	1
M9	O-demethyl-25CN-NBOMe		313.149	313.155	C18H21O3N2	-18.2018	0.00952381
			91.0018	91.0548	C7H7	-581.848	0.361905
			93.0166	93.0704	C7H9	-578.379	1
			120.993	121.065	C8H9O	-598.024	0.2
M10	25CN-NBOH		313.151	313.155	C18H21O3N2	-11.8152	0.0212766
			106.988	107.05	C7H7O	-577.302	0.468085
			174.959	175.063	C10H9O2N	-597.498	0.138298
			189.972	190.087	C11H12O2N	-603.935	1
			206.988	207.113	C11H15O2N2	-604.5	0.446809
M11	O,O-bis-demethyl-25CN-NBOMe		299.133	299.14	C17H19O3N2	-20.7261	0.0142857
			91.0019	91.0548	C7H7	-580.749	0.0714286
			93.0167	93.0704	C7H9	-577.305	0.0285714
			120.993	121.065	C8H9O	-599.676	1
			134.964	135.045	C8H7O2	-599.802	0.0357143
M12	O-demethyl-25CN-NBOH		299.134	299.14	C17H19O3N2	-19.0546	0.0138889
			106.986	107.05	C7H7O	-593.182	0.458333
			175.964	176.071	C10H10O2N	-611.116	1
			192.979	193.098	C10H13O2N2	-612.643	0.736111
M13	O,O-bis-demethyl-hydroxy-25CN-NBOMe 1		315.13	315.135	C17H19O4N2	-15.5489	0.03
			106.988	107.05	C7H7O	-575.434	0.06
			136.978	137.06	C8H9O2	-602.654	1
M14	O,O-bis-demethyl-hydroxy-25CN-NBOMe 2-4		315.128	315.135	C17H19O4N2	-19.0395
M15	O-demethyl-dehydro-hydroxy-25CN-NBOMe		327.128	327.135	C18H19O4N2	-18.9524
M16	O,O-bis-demethyl-dehydro-25CN-NBOMe		297.119	297.124	C17H17O3N2	-15.1452
M17	O,O-bis-demethyl-25CN-NBOH		285.119	285.124	C16H17O3N2	-15.7826	0.0642857
			106.987	107.05	C7H7O	-587.578	0.785714
			161.957	162.055	C9H8O2N	-606.582	0.821429
			178.973	179.082	C9H11O2N2	-608.659	0.764286
			197.009			#DIV/0!	0.242857
			232.949			#DIV/0!	1
M18	2C-CN		207.11	207.113	C11H15O2N2	-18.3474	0.0179856
			159.943	160.04	C19H21O3N2	-606.724	0.0791367
			174.957	175.063	C10H9O2N	-604.924	0.830935
			189.971	190.087	C11H12O2N	-607.617	1
M19	O-demethyl-2C-CN		193.095	193.098	C10H13O2N2	-13.9826	0.0578512
			120.993	121.065	C8H9O	-593.894	1
			147.988	148.076	C9H10ON	-599.016	0.165289
			160.951	161.048	C9H7O2N	-602.306	0.119835
			175.964	176.071	C10H10O2N	-606.005	0.0661157
M20	O-demethyl-deamino-hydroxy-2C-CN		194.078	194.082	C10H12O3N	-17.5184
M21	O-demethyl-deamino-carboxy-2C-CN		208.058	208.061	C10H10O4N	-16.822	0.114286
			120.994	121.065	C8H9O	-589.764	0.161905
			161.957	162.055	C9H8O2N	-605.348	1
M22	2C-CONH2-NBOMe		345.176	345.181	C19H25O4N2	-15.0645	0.0555556
			120.993	121.065	C8H9O	-593.894	1
M23	O-demethyl-2C-CONH2		211.104	211.108	C10H15O3N2	-18.9476
M24	O,O-bis-demethyl-hydroxy-2C-COOH-NBOMe		334.124	334.129	C17H20O6N	-15.8621
M25	2C-COOH		226.104	226.108	C11H16O4N	-15.9216	1
			207.971	208.097	C11H14O3N	-609.33	0.14433
M8I G	O-demethyl-hydroxy-25CN-NBOMe glucuronide 1		505.172	505.182	C24H29O10N2	-19.3989	< 1%
			91.0021	91.0548	C7H7	-578.553	0.03
			120.993	121.065	C8H9O	-596.372	1
			328.944	329.15	C18H21O4N2	-626.158	0.142857
M8 G	O-demethyl-hydroxy-25CN-NBOMe glucuronide 2		505.173	505.182	C24H29O10N2	-17.8154	0.0263158
			120.993	121.065	C8H9O	-595.546	1
			136.977	137.06	C8H9O2	-604.843	0.231579
			328.944	329.15	C18H21O4N2	-626.158	0.131579
M9 G	O-demethyl-25CN-NBOMe glucuronide		489.179	489.187	C24H29O9N2	-16.9669	0.0164706
			91.0024	91.0548	C7H7	-575.258	0.105882
			120.993	121.065	C8H9O	-598.024	1
			312.961	313.155	C18H21O3N2	-620.14	0.235294
M11 G	O,O-bis-demethyl-25CN-NBOMe glucuronide		475.163	475.172	C23H27O9N2	-18.7301	0.0227273
			91.0024	91.0548	C7H7	-575.258	0.181818
			93.0166	93.0704	C7H9	-578.379	0.0636364
			120.993	121.065	C8H9O	-597.198	1
			298.954	299.14	C17H19O3N2	-622.118	0.318182
M13 G	O,O-bis-demethyl-hydroxy-25CN-NBOMe glucuronide 1		491.158	491.167	C23H27O10N2	-17.9165	0.0322581
			120.994	121.065	C8H9O	-591.416	0.145161
			136.978	137.06	C8H9O2	-599.006	1
			314.938	315.135	C17H19O4N2	-623.226	0.0967742
M14 G	O,O-bis-demethyl-hydroxy-25CN-NBOMe glucuronide 2		491.157	491.167	C23H27O10N2	-18.9345
M16 G	O,O-bis-demethyl-dehydro-25CN-NBOMe glucuronide		473.147	473.156	C23H25O9N2	-20.0779
M17 G	O,O-bis-demethyl-25CN-NBOH glucuronide		461.148	461.156	C22H25O9N2	-16.6972	0.0366667
			106.987	107.05	C7H7O	-584.775	0.183333
			161.958	162.055	C9H8O2N	-601.646	0.133333
			178.974	179.082	C9H11O2N2	-605.309	1
			284.947	285.124	C16H17O3N2	-619.029	0.166667
M19 G	O-demethyl-2C-CN glucuronide		369.124	369.13	C16H21O8N2	-15.4417
M26 G	oxo-2C-CN glucuronide		397.117	397.125		-20.1448	0.0606061
			161.958	162.055	C9H8O2N	-603.497	0.560606
			178.973	179.082	C9H11O2N2	-608.101	1
			220.957	221.093	C11H13O3N2	-612.865	0.939394
M3 S	hydroxy-25CN-NBOMe sulfate		423.115	423.123	C19H23O7N2S	-18.4344	0.0590551
			109.001	109.065	C7H9O	-584.971	0.433071
			122.972	123.045	C7H7O2	-592.468	0.275591
			135.971	136.052	C8H8O2	-595.359	0.913386
			136.978	137.06	C8H9O2	-596.818	1
			342.952	343.166	C19H23O4N2	-622.44	0.11811
M8 S	O-demethyl-hydroxy-25CN-NBOMe sulfate		409.1	409.107	C18H21O7N2S	-17.3549	0.0285714
			109	109.065	C7H9O	-600.558	0.142857
			120.992	121.065	C8H9O	-602.154	1
			122.971	123.045	C7H7O2	-602.221	0.222857
			135.97	136.052	C8H8O2	-603.444	0.308571
			136.977	137.06	C8H9O2	-605.573	0.36
M9 S	O-demethyl-25CN-NBOMe sulfate		393.104	393.112	C18H21O6N2S	-19.3329	0.0502793
			106.987	107.05	C7H7O	-587.578	0.553073
			174.958	175.063	C10H9O2N	-604.353	0.189944
			189.972	190.087	C11H12O2N	-604.461	1
			206.988	207.113	C11H15O2N2	-607.397	0.586592
			312.961	313.155	C18H21O3N2	-620.459	0.111732
M11 S	O,O-bis-demethyl-25CN-NBOMe sulfate		379.089	379.096	C17H19O6N2S	-19.2563
			91.0022	91.0548	C7H7	-577.455	0.0606061
			93.017	93.0704	C7H9	-574.081	0.020202
			120.993	121.065	C8H9O	-599.676	1
M12 S	O-demethyl-25CN-NBOH sulfate		379.089	379.096	C17H19O6N2S		0.06
			106.987	107.05	C7H7O	-588.512	0.67
			120.993	121.065	C8H9O	-593.068	0.26
			175.964	176.071	C10H10O2N	-608.277	0.63
			192.98	193.098	C10H13O2N2	-612.125	1
M13 S	O,O-bis-demethyl-hydroxy-25CN-NBOMe sulfate isomer 1		395.084	395.091	C17H19O7N2S	-18.983
M14 S1	O,O-bis-demethyl-hydroxy-25CN-NBOMe sulfate isomer 2		395.084	395.091	C17H19O7N2S	-17.2112	0.0551471
			122.972	123.045	C7H7O2	-593.281	0.533088
			136.978	137.06	C8H9O2	-598.277	0.165441
			175.965	176.071	C10H10O2N	-605.437	1
			192.98	193.098	C10H13O2N2	-609.536	0.690909
M 14 S2	O,O-bis-demethyl-hydroxy-25CN-NBOMe sulfate isomer 3		395.084	395.091	C17H19O7N2S	-18.983	0.108844
			120.993	121.065	C8H9O	-594.72	1
			122.971	123.045	C7H7O2	-600.595	0.714286
			136.978	137.06	C8H9O2	-601.195	0.0544218
			175.964	176.071	C10H10O2N	-611.116	0.632653
			192.979	193.098	C10H13O2N2	-612.643	0.714286
			314.938	315.135	C17H19O4N2	-622.591	0.0680272
M17 S1	O,O-bis-demethyl-25CN-NBOH sulfate isomer 1		365.074	365.081	C16H17O6N2S	-18.8999
M17 S2	O,O-bis-demethyl-25CN-NBOH sulfate isomer 2		365.074	365.081	C16H17O6N2S	-19.4478	0.0193548
			106.988	107.05	C7H7O		1
			160.951	161.048	C9H7O2N		0.13871
			258.88	259.039	C9H11O5N2S	-614.58	0.967742
M26 S	oxo-2C-CN sulfate		301.044	301.049	C11H13O6N2S	-17.2729	0.08
			134.963	135.045	C8H7O2	-604.985	0.29
			161.957	162.055	C9H8O2N	-609.051	0.115385
			178.973	179.082	C9H11O2N2	-609.776	1
			220.955	221.093	C11H13O3N2	-623.268	0.22
			258.877	259.039	C9H11O5N2S	-624.617	0.0692308
M19 Ac	O-demethyl-2C-CN N-acetyl isomer 1		235.103	235.108	C12H15O3N2	-20.8415	0.0133333
			175.964	176.071	C10H10O2N	-610.548	1
			192.98	193.098	C10H13O2N2	-611.09	0.386667
M19 Ac	O-demethyl-2C-CN N-acetyl isomer 2		235.104	235.108	C12H15O3N2	-19.5655	0.00806452
			160.951	161.048	C9H7O2N	-601.685	0.112903
			175.964	176.071	C10H10O2N	-607.141	1
			192.98	193.098	C10H13O2N2	-607.982	0.193548
M19 Ac G	O-demethyl-2C-CN N-acetyl glucuronide		411.133	411.14	C18H23O9N2	-18.2419	<1%
			160.951	161.048	C9H7O2N	-602.927	0.0547945
			175.964	176.071	C10H10O2N	-610.548	0.821918
			192.98	193.098	C10H13O2N2	-610.572	1
			234.964	235.108	C12H15O3N2	-615.461	0.712329
M19 Ac S	O-demethyl-2C-CN N-acetyl sulfate		315.059	315.065	C12H15O6N2S	-18.4089	0.0151515
			160.95	161.048	C9H7O2N	-607.273	0.0909091
			175.964	176.071	C10H10O2N	-606.005	1
			192.98	193.098	C10H13O2N2	-609.536	0.30303
			234.964	235.108	C12H15O3N2	-612.058	0.0454545
M27 Ac	hydroxy-2C-CN N-acetyl		265.114	265.119	C13H17O4N2	-18.4823
